# Supplementary material for: Multiplexed direct genomic selection (MDiGS): a pooled BAC capture approach for highly accurate CNV and SNP/INDEL detection
Source: PubMed Central journal article supplement — Nucleic Acids Res. 2014 Mar 20;42(10):e82. doi: 10.1093/nar/gku218 (PMC4041413; doi:10.1093/nar/gku218), 2014-03-20
Supplement: supp_gku218_nar-00046-met-k-2014-File009.pdf [file supp_gku218_nar-00046-met-k-2014-File009.pdf]

# Multiplexed Direct Genomic Selection (MDiGS)-Gurnett Lab (Washington University in St. Louis)

Illumina Multiplexed Library Prep modified from Ramos, E. *et al.* Population-based rare variant detection via pooled exome or custom hybridization capture with or without individual indexing. *BMC Genomics* **13**, 683 (2012).

Biotinylated BAC Capture modified from Bashiardes, S. *et al.* Direct genomic selection. *Nat Methods* **2**, 63-9 (2005).

All pre-capture reactions are for 48 samples. Volumes can be scaled up to 96 samples or post capture pools of 48 can be combined for sequencing. Using 150 ng of genomic DNA, multiplex libraries are typically suitable for up to 10 captures.

## **Sonication**

Start with DNA samples diluted to 50 ng/ul in H<sub>2</sub>O (Qubit) In an AB-1900 plate (Thermo-Fast), add 50 ul Ampure XP bead solution with 100 ul H<sub>2</sub>O to each well

Replace media with 106 ul 1x TE and add to each well:

Add 45 ul 5M NaCl

Add 6 ul DNA (300 ng total) (Final volume = 157 ul per well)

Cover wells with strip caps (Bio-Rad TCS0803) and sonicate on a Covaris E210

7mm vertical offset, 10% duty cycle, intensity = 5, 500 cycles per burst, 10 minutes per well

For wells with air pockets, mark wells, centrifuge and repeat 2 minutes per well

## **Purify and concentrate DNA**

Pulse centrifuge 500 rpm and remove strip caps

Add 45 ul 50% PEG 3350 to each well

Cover with film (AB-0558-Thermo Scientific) and vortex > 10 seconds

Incubate 5 minutes at room temp

Pulse centrifuge (500 rpm) and place plate on magnet 2-3 minutes (until beads settle on well wall)

Wash each well 2x with 75 ul 70% EtOH

Dry 5 minutes, **MAKE SURE ALL WELLS ARE DRY BEFORE PROCEEDING**

Add 10 ul H<sub>2</sub>O to each well, cover with film and vortex 10 seconds

Incubate 2 minutes and pulse centrifuge

## **Agarose QC concentration and shearing**

Remove 1 ul supernatant (bead separated) from 2 random wells, replace with 1 ul of H<sub>2</sub>O

Run 1 ul on an agarose gel to confirm shearing and DNA concentration (**Expect 300-800 bp**)

## **End Repair DNA using NEB reagents**

100 ul T4 DNA Ligase Buffer with 10 mM dATP

50 ul T4 DNA Polymerase

50 ul T4 PNK

40 ul 10 mM dNTPs

10 ul Klenow (DNA Polymerase I, Large Fragment Klenow)

250 ul H<sub>2</sub>O

Aliquot 10 ul to each well (20 ul final volume) Cover with film, vortex and pulse spin

Incubate 30 min at 20C

### **PEG Cleanup**

Add 20 ul of 25% PEG 3350/2.5M NaCl mix (2 ml 50% PEG + 2 ml 5M NaCl)

Cover and vortex for > 10 seconds

Incubate 5 min and pulse spin

Wash 2x with 75 ul 70% EtOH and dry 5 min

Add 10 ul H<sub>2</sub>O, cover and vortex 10 seconds

Incubate 2 min and pulse spin (**Store at 4C or proceed with A-Tailing. Do not freeze**)

### **Adenylate 3' ends**

100 ul Klenow Buffer (NEB Buffer 2 )

340 ul 1mM dATP

60 ul Klenow exo-

Aliquot 10 ul to each well

Pulse spin, vortex and pulse spin

Incubate 30 min, 37C

Add 20 ul of 25% PEG 3350/2.5M NaCl mix (2 mL 50% PEG + 2 mL 5M NaCl)

Cover and vortex for > 10 seconds

Incubate 5 min and pulse spin

Wash 2x with 75 ul 70% EtOH and dry 5 min

Resuspend in 8.75 ul water, cover and vortex 10 seconds

Incubate at room temp for 2 min and **PROCEED IMMEDIATELY TO LIGATION**

### **Ligate Adapters**

Add 2.5 ul pre-annealed indexing adapters to each well (Ramos et al., 2012 BMC Genomics )

Make Buffer/H<sub>2</sub>O master mix for 50 samples:

625 ul 2x Ligation Buffer

62.5 ul T4 DNA Quick Ligase

Aliquot 13.75 ul to each well

Cover, vortex and pulse spin

Incubate 15 min at 20C

Add 2.75 ul 0.5M EDTA (Stop Solution), cover and vortex (27.75 ul final volume)

### **Remove unligated adapters**

Add PEG/NaCl mix to achieve a final PEG concentration of 9.5% w/v

200 ul H<sub>2</sub>O

1,216 ul 50% PEG

1600 ul 5M NaCl

Aliquot 24.75 ul of PEG/NaCl mix to 27.75 ul of Stopped Ligation Reaction

Final Volume = 52.5 ul

Cover and vortex for > 10 seconds

Incubate 5 min and pulse spin

Wash 2x with 75 ul 70% EtOH and dry 5 min

Add 17 ul H<sub>2</sub>O, vortex and incubate 2 min at room temp

Spin and transfer 17 ul to fresh plate -> Qubit 1-2ul of each sample

### **Pool Multiplexed Library and Repeat PEG Purification**

Aim to pool a total of 50 ng of DNA per individual in sets of 48.

If samples are less than 50 ng, do not titrate down the DNA from other samples to match the lower samples as this will increase the PCR duplication percentage throughout the entire data set.

### **Remove un-incorporated adapters prior to Pre-Capture PCR amplification**

Repeat 9.5% PEG purification on pooled samples prior to Pre-Capture PCR using formula:

Final Volume (**FV**) = Pooled DNA volume \* 1.82

50% PEG (**P**) = FV/5.26

5M NaCl (**N**) = FV/4

H<sub>2</sub>O (**H**) = **FV** - P - N - DNA

In Lo-Bind (Eppendorf cat# 022431021) tube add:

50 ul AmpureXP beads + 100 ul H<sub>2</sub>O and replace supernatant with Pooled Multiplexed DNA Library

Add **N** ul of 5M NaCl

Add **P** ul of 50% PEG and

Add **H** ul of H<sub>2</sub>O so that final concentration = 9.5% PEG and 1.25 M NaCl

Incubate 5 min, wash 2x with 500 ul 70% EtOH -> Elute in 50 ul H<sub>2</sub>O and Qubit. (Expect ~40 ng/ul)

Transfer 1ug to a PCR tube and take up to 50 ul with H<sub>2</sub>O.

**Run 2.5 ul on a gel to confirm adapter removal and check quality**

### **Pre-Capture PCR**

Add directly to multiplexed library elution in PCR tube:

2.5 ul Pre-Hyb Primer F (10 uM)

2.5 ul Pre-Hyb Primer R (10 uM)

2.5 ul 10 mM dNTPs

55 ul NEBNext High-Fidelity 2x PCR Master Mix

110 ul Final Volume

Save 5 ul as Pre-PCR sample

### **PCR Conditions**

98C x 10 sec

6 Cycles:

98C x 20 sec

57C x 30 sec

72C x 30 sec

72C x 5 min

4C hold

Run 5 ul of Pre-PCR and 5 ul of Post-PCR on an agarose gel (100 ul of Post-PCR remaining)

Successful adapter ligation should give a brighter band for the Post-PCR compared to Pre-PCR product

Primer may be visible < 100, determine if adapter dimer is present (120 bp band)

If there is no adapter dimer:

Add 180 ul AmpureXP beads in stock solution to 100 ul Post-PCR product in Lo-Bind tube

Standard 5 min incubation/500 ul 70% EtOH washes (x2) and elute in 50 ul H<sub>2</sub>O

If there is adapter dimer (120 bp band):

Prepare 50 ul AmpureXP beads + 100 ul H<sub>2</sub>O in a Lo-Bind tube

Replace supernatant with 100 ul Post-PCR product

Add 45 ul 5M NaCl

Add 34 ul of 50% PEG (Final volume = 179 ul (9.5% PEG, 1.25M NaCl)

Standard 5 min incubation//500 ul 70% EtOH washes (x2) and elute in 25 ul H<sub>2</sub>O

Qubit 1 ul of purified sample (Expect 50-100 ng /ul)

# Biotinylated BAC Hybridization

---

## **Biotinylate BAC (Nick Translation)**

500 ng BAC  
5 ul dNTP minus dTTP (0.2 uM each)  
1 ul Biotin-16-dUTP (1mM)  
1 ul Unlabeled dTTP (0.1mM)  
Up to 45 ul with H<sub>2</sub>O  
5 ul DNA Polymerase/DNase mix  
Incubate 1 hr 15C  
Add 5 ul 0.5M EDTA and 50 ul H<sub>2</sub>O  
G-50 Sephadex purify and take up to 100 ul with H<sub>2</sub>O  
Store at -20 or proceed with hybridization

## **BAC Capture**

Combine in a 1.5 mL tube and lyophilize:  
100 ng Biotinylated BACs at equimolar concentrations (Capture Region)  
250 ng Non-Biotin sheared blocking (Non-Capture Region)\*  
5 ul Human Cot-1 DNA (1 ug/ul)  
\*Blocking BAC can be any non-biotin labeled BAC from outside the capture region that has been sheared to ~300-800 bp

Resuspend in 2.5 ul H<sub>2</sub>O and transfer to PCR tubes  
Denature 95C - 5 min  
Incubate 65C - 15 min  
Add 2.5 ul 2x Hybridization and incubate 5 hrs at 65C

Combine in a 1.5 mL tube and lyophilize:  
1 ug of Multiplexed Library (Use 1 ug regardless of sample size)  
2.5 ul Blocking Oligo 1 (100 uM)  
2.5 ul Blocking Oligo 2 (100 uM)  
1 ul Post-Hyb R (100 uM)  
Resuspend in 2.5 ul H<sub>2</sub>O and transfer to PCR tube  
Denature 95C - 5 min  
Incubate 65C - 15 min  
Add 2.5 ul 2x Hybridization buffer and transfer total (5 ul) to BAC Hyb (10 ul final volume)  
Add a drop of mineral oil to prevent evaporation and incubate 65C for 70hrs

## **Bind and Wash Hybridizations**

Wash 100 ul Streptavidin beads with 200 ul Binding Buffer in Lo-Bind tube for each capture

Add 150 ul Binding Buffer to Hybridization and transfer to washed beads

Incubate 30 min at room temp, rocking

Wash 1x with Wash buffer 1, 15 min room temp rocking

Pre-warm Wash Buffer 2 to 65C

Wash 3x with Wash buffer 2, 15 min each at 65C

Elute in 50 ul 0.1M NaOH, 10 min 25C -> Transfer to Lo-Bind tube and add:

50 ul 1M Tris-HCl

180 ul AmpureXP beads

Incubate 5 min at room temp and wash with 2x 500 ul 70% EtOH

Elute in 44 ul H<sub>2</sub>O

## **Post Hyb PCR**

Amplify captured products with Post-Hyb Linker primers:

1 ul 10mM dNTPs

50 ul NEBNext Polymerase (2x)

2.5 ul Post-Hyb primer F (10 uM)

2.5 ul Post-Hyb primer R (10 uM)

Add 44 ul re-suspended capture product (100 ul final volume)

98C x 30 sec

16 Cycles

98C x 20 sec

57C x 30 sec

72C x 30 sec

72C x 5 min

4C hold

In 2 Lo-Bind tube, add 50 ul AmpureXP beads and 100 ul H<sub>2</sub>O

Replace supernatant with 100 ul Post-PCR Product and add:

50 ul 5M NaCl

39 ul 50% PEG

11 ul H<sub>2</sub>O

Final volume = 200 ul (9.75% PEG and 1.25 M NaCl)

5 min hybridization and wash with 2x 500 ul 70% EtOH

Elute in 20 ul H<sub>2</sub>O

Qubit 1 ul of each using high sensitivity kit

Multiplexed DNA Library should be >30 ng/ul

# Reagents

**2x Hybridization Buffer:** 1.5 M NaCl, 40 mM sodium phosphate buffer (pH 7.2), 10 mM EDTA (pH 8.0), 10x Denhardt's, 0.2% SDS

**Streptavidin Bead Binding Buffer:** 10 mM Tris-HCL (pH 7.5), 1 mM EDTA (pH 8) and 1 M NaCl

**Wash Buffer 1:** 1X SSC with 0.1% SDS

**Wash Buffer 2:** 0.1X SSC with 0.1% SDS

**Elution Buffer:** 0.1 M NaOH

| Supplier        | Catalog Number | Reagent                                 |
|-----------------|----------------|-----------------------------------------|
| NEB             | MO203L         | T4 DNA Polymerase                       |
| NEB             | M0201L         | T4 PNK                                  |
| NEB             | M0210L         | Klenow                                  |
| NEB             | M0212L         | Klenow (exo-)                           |
| NEB             | M2200L         | Quick Ligation Kit                      |
| NEB             | M0541L         | NEBNext High-Fidelity 2x PCR Master Mix |
| Invitrogen      | 112.05D        | Dynabeads M-280 Streptavidin            |
| Beckman Coulter | A63880         | AmpureXP Beads                          |
| Sigma           | P3640-500G     | PEG3350                                 |
| Roche           | 11093070910    | Biotin-16-dUTP                          |
| Invitrogen      | 15279-011      | Human Cot-1 DNA                         |
| Invitrogen      | 18160-010      | Nick Translation System                 |

## PCR Primers and Blocking Oligo Sequences:

Indexing adapter sequences are described in Ramos, E. *et al. BMC Genomics* **13**, 683 (2012).

|                  |                                                                   |
|------------------|-------------------------------------------------------------------|
| Pre-Hyb F        | CAAGCAGAAGACGGCATAACGAGAT                                         |
| Pre-Hyb R        | AATGATACGGCGACCACCGAGATC                                          |
| Blocking Oligo 1 | CAAGCAGAAGACGGCATAACGAGATIIIIIIIGTACTGGAGTTCAGACGTGTGCTCTTCCGATCT |
| Blocking Oligo 2 | AGATCGGAAGAGCACACGTCTGAACTCCAGTCACIIIIIIITCTCGTATGCCGTCTTCTGCTTG  |
| Post-Hyb F       | CAAGCAGAAGACGGCATAACGAGAT                                         |
| Post-Hyb R       | AATGATACGGCGACCACCGAGATCTACTCTTTCCCTACACGACGCTCTTCCGATCT          |

# Pre-Capture Multiplex Sample Number

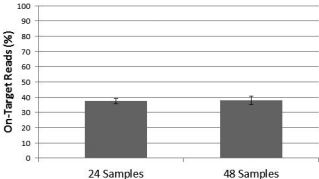

A

## MDiGS Sample Coverage

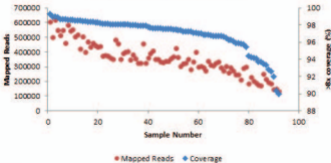

B

## MDiGS Coverage Histogram

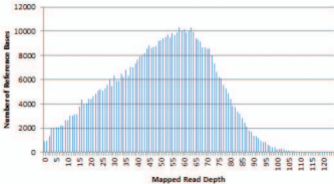



**Table 1. Rare variants (MAF<0.01) in patients with lower limb malformations (n=168)**

| CHR | POS       | rsID        | dbSNP <sup>a</sup> | EVS <sup>b</sup> | GENE   | REF | ALT | GVS        | PP      | AA      |
|-----|-----------|-------------|--------------------|------------------|--------|-----|-----|------------|---------|---------|
| 5   | 134367152 | .           | .                  | .                | PITX1  | CG  | C   | frameshift | .       | .       |
| 12  | 54333343  | .           | .                  | .                | HOXC13 | C   | A   | missense   | 218/331 | ALA/ASP |
| 12  | 54338922  | .           | .                  | .                | HOXC13 | G   | A   | missense   | 292/331 | ARG/HIS |
| 12  | 54349241  | rs189468720 | .                  | .                | HOXC12 | C   | G   | missense   | 176/283 | ASN/LYS |
| 12  | 54350180  | rs144078525 | .                  | 0.0015           | HOXC12 | G   | A   | missense   | 227/283 | ALA/THR |
| 12  | 54357753  | rs76786961  | .                  | .                | HOTAIR | GT  | T   | ncRNA      | .       | .       |
| 12  | 54361101  | rs192969443 | .                  | .                | HOTAIR | G   | A   | ncRNA      | .       | .       |
| 12  | 54367036  | .           | .                  | .                | HOXC11 | C   | T   | missense   | 4/305   | SER/LEU |
| 12  | 54367597  | .           | .                  | .                | HOXC11 | C   | T   | missense   | 191/305 | SER/PHE |
| 12  | 54369114  | rs201917577 | 0.001              | .                | HOXC11 | A   | G   | missense   | 278/305 | ILE/VAL |
| 12  | 54379510  | rs149717368 | 0.001              | 0.0004           | HOXC10 | C   | G   | missense   | 156/343 | SER/CYS |
| 12  | 54379596  | rs34108563  | .                  | 0.0004           | HOXC10 | G   | A   | missense   | 185/343 | GLU/LYS |
| 12  | 54403334  | .           | .                  | .                | HOXC8  | A   | G   | missense   | 89/243  | TYR/CYS |
| 17  | 59533867  | rs117410176 | 0.001              | 0.0005           | TBX4   | G   | A   | missense   | 6/546   | GLY/SER |
| 17  | 59560350  | rs199727670 |                    |                  | TBX4   | C   | G   | missense   | 371/546 | PRO/ALA |

<sup>a</sup>dbSNP=minor allele frequency in dbSNP; <sup>b</sup>EVS=minor allele frequency in all Exome Variant Server populations.

# Exome Capture CNV Analysis

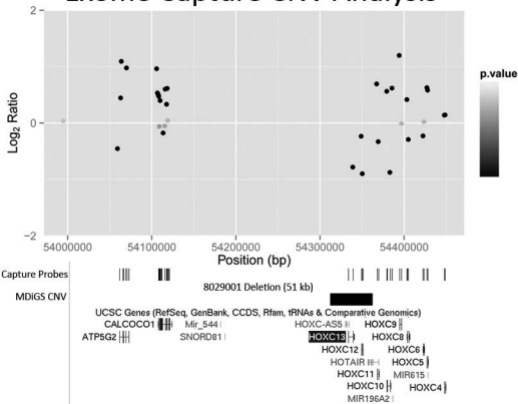

**Supplementary Methods. MDiGS Method.** Multiplexed Direct Genomic Selection (MDiGS) library prep and BAC hybridization protocol.

**Supplementary Figure 1. MDiGS sample numbers.** There was no difference in on-target read percentage for 24 and 48 samples multiplexed pre-capture.

**Supplementary Figure 2. MDiGS coverage and histogram.** (A) Individual sample read counts corresponding to coverage ( $\geq 8x$ ) of target regions, all samples achieved  $\geq 90\%$  coverage. (B) Coverage histogram of mapped reads at coverage depths.

**Supplementary Figure 3. Microdeletion detected by MDiGS cannot be identified using whole-exome sequence data.** Copy number analysis of whole-exome data captured using non-contiguous probes failed to detect the novel 51 kb deletion in individual 8029001 that was detected by the MDiGS method (shown in Figure 7A).
